# Supplementary material for: Molecular evolution and functional characterisation of an ancient phenylalanine ammonia-lyase gene (NnPAL1) from Nelumbo nucifera: novel insight into the evolution of the PAL family in angiosperms
Source: PubMed Central journal article supplement (PMC4102242; doi:10.1186/1471-2148-14-100), 2014-05-09

Figure S2. Sequence alignment between NnPAL1 and other typical PALs in seed plants.

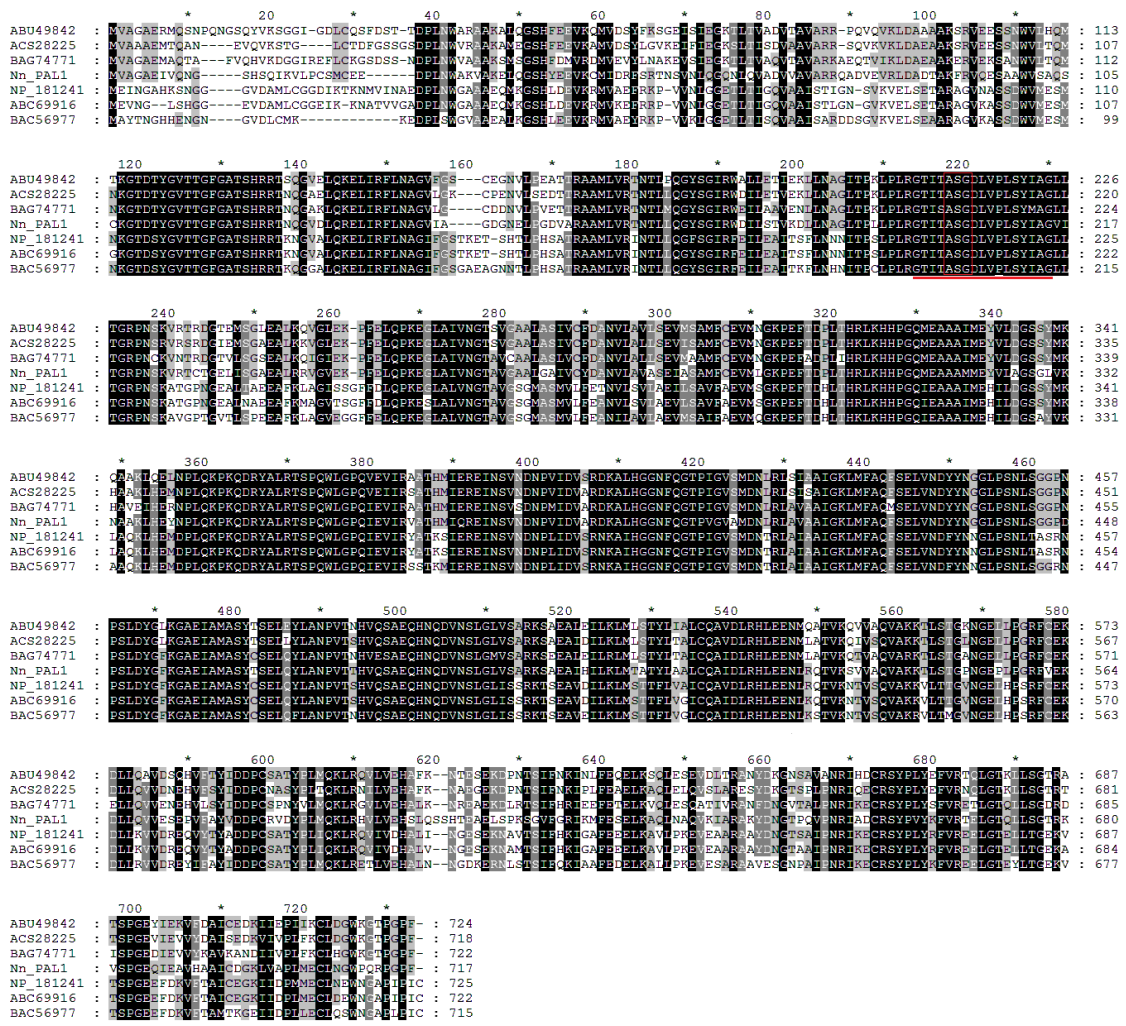

Supplement: 1471-2148-14-100-S2.pdf [file 1471-2148-14-100-S2.pdf]
